# Supplementary material for: Phenothiazine and triphenylamine-based fluorescent Schiff bases for the dual application of white light generation and H2O2 sensing
Source: Royal Society of Chemistry journal article supplement (doi:10.1039/d2nj02618j), 2022-01-01
Supplement: d2nj02618j1.pdf [file d2nj02618j1.pdf]

# **Phenothiazine and Triphenylamine based Fluorescent Schiff Bases for the Dual Application of White Light Generation and H<sub>2</sub>O<sub>2</sub> sensing**

**Yash B. Barot<sup>a</sup>, Vivek Anand<sup>b,1</sup> and Roli Mishra<sup>a\*,1</sup>**

<sup>a</sup>Department of Biotechnology and Bioengineering, Institute of Advanced Research, Gujarat,  
382426, India

<sup>b</sup>Department of Chemistry, University Institute of Science, Chandigarh University, Gharuan  
Mohali 140413, Punjab, India

\*Author for Correspondence: [rolimishra2@gmail.com](mailto:rolimishra2@gmail.com); [rolimishra@iar.ac.in](mailto:rolimishra@iar.ac.in)

<sup>1</sup>These authors contributed equally to this work

### **Synthesis of 4-(diphenylamino)benzaldehyde (TPA-CHO):**

In a Rb flask containing DMF (10 ml), POCl<sub>3</sub> (0.76 ml, 8.15 mmol) was added at 0 °C to form Vilsmeier-Haack reagent. Triphenylamine (2 gm, 8.15 mmol) was added after 60 minutes in Vilsmeier-Haack reagent and the mixture was stirred at 80 °C for 18 hrs and poured into ice-cold water and basified using K<sub>2</sub>CO<sub>3</sub> and extracted using EtOAc. Then, the mixture was washed with water and dried using Na<sub>2</sub>SO<sub>4</sub> and evaporated. After that, the reaction mixture was purified by column chromatography using (Hexane/EtOAc, 9:1) as eluent to give white solid of TPA-CHO (1.96 gm, yield 86%). <sup>1</sup>H NMR (400 MHz, CDCl<sub>3</sub>): δ 9.81 (s, 1H), 7.67- 7.69 (d, *J* = 8.00 Hz, 2H), 7.32-7.36 (m, 4H), 7.17-7.18 (m, 6H), 7.01-7.02 (d, *J* = 4.00 Hz, 2H). <sup>13</sup>C NMR (100 MHz, CDCl<sub>3</sub>): δ 190.59, 153.50, 146.29, 131.44, 129.87, 126.45, 125.25, 119.48. MS (EI) *m/z*: 274.12  
 $\lambda_{\max}^{\text{abs}}$ : 353 nm (DMF),  $\lambda_{\max}^{\text{ems}}$ : 510 nm (DMF).

### **Synthesis of Di-Triphenyl Amine based Schiff base (DTPA-SB):**

The Schiff base was prepared by condensation of TPA-CHO (0.9 gm, 2 mmol) with ethylenediamine (0.1 ml, 1 mmol) in MeOH (15 ml). The reaction mixture was stirred at 65 °C for 12 hrs. After completion of reaction, solvent was evaporated and the crude product was washed with cold MeOH and dried to give DTPA-SB (1.2 gm, yield: 69 %). <sup>1</sup>H NMR (400 MHz, CDCl<sub>3</sub>): δ 8.12 (s, 2H), 7.48-7.46 (d, *J* = 8.00 Hz, 4H), 7.20-7.05 (m, 8H), 7.03-7.00 (m, 4H), 6.96-6.95 (m, 12H), 3.84 (m, 4H), 3.48 (Solvent peak: MeOH). <sup>13</sup>C NMR (100 MHz, CDCl<sub>3</sub>): δ 162.28, 150.24, 147.28, 129.54, 129.28, 125.31, 123.83, 122.05, 61.89, 50.96 IR (KBr): 3336, 2935, 1635, 1585, 1484, 1423, 1270, 756, 695, 529 cm<sup>-1</sup>. MS (EI) *m/z*: 573.18.  $\lambda_{\max}^{\text{abs}}$ : 345 nm (DMF),  $\lambda_{\max}^{\text{ems}}$ : 449 nm (DMF).

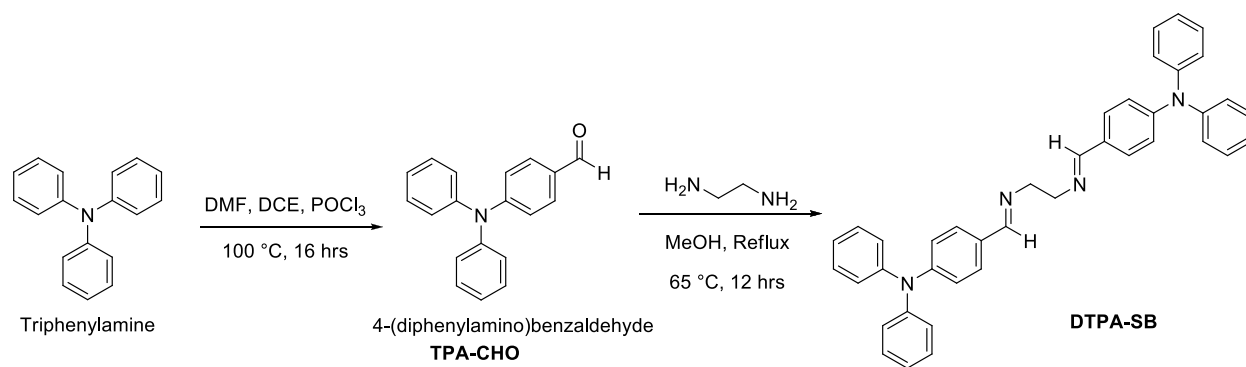

### Scheme S1: Synthesis of TPA-CHO and DTPA-SB

#### Synthesis of Phenothiazine Carbaldehyde (PTZ-CHO):

To a combination of phenothiazine (2.5 g, 12.5 mmol) and C<sub>6</sub>H<sub>13</sub>Br (1.93 ml, 13.9 mmol) in 50 mL DMSO, NaOH (0.85 g, 21.32 mmol) was added under cooling condition. Then, the resultant blend was stirred at RT for 24 hours after which 200 mL of H<sub>2</sub>O was mixed. The resultant mix was extracted using CHCl<sub>3</sub> (3x50 mL) and water. Then, the organic layer was washed with a saturated brine solution and then dried using anhydrous Na<sub>2</sub>SO<sub>4</sub> to remove any trace of moisture. After evaporating the solvent, the mixture was purified via column chromatography, in which n-hexane was used as the solvent on silica gel. Finally, white oily liquid (Compound 1, yield 86.15%) was obtained. After obtaining Compound 1 which is the alkylated form of phenothiazine, PTZ-CHO was synthesized. For the synthesis of PTZ-CHO, POCl<sub>3</sub> (2.64 mL, 28.2 mmol) was added dropwise to an ice cooled RB flask comprising DMF (12 mL). The combination was stirred at 0 °C for 1 hour and then, compound 1 (1.78 gm, 6.2 mmol) was added to it. Finally, the reaction mix was exposed to a temperature of 80 °C for 16 h. After that, the crude product was poured into ice-water. Then, saturated aqueous K<sub>2</sub>CO<sub>3</sub> was added to the mixture and extracted with chloroform (4x30 mL). Eventually, moisture was removed using MgSO<sub>4</sub>. Finally, the solvent was removed using rotatory evaporator, and the crude product was purified using column chromatography

[Hexane/EtOAc (8:2) as eluent]. Thus, a pale-yellow solid is obtained (Compound 2, yield 96%).  
 $^1\text{H}$  NMR (400 MHz,  $\text{CDCl}_3$ ):  $\delta$  9.79 (s, 1H), 7.65-7.63 (d,  $J = 8.50$  Hz, 2H), 6.96-7.58 (m, 5H), 3.89 (t, 2H), 1.54-1.81 (m, 4H), 1.26-1.31 (m, 6H).  $^{13}\text{C}$  NMR (100 MHz,  $\text{CDCl}_3$ ):  $\delta$  190.17, 150.88, 143.56, 131.14, 130.20, 125.12, 123.91, 123.68, 116.06, 114.90, 48.13, 31.49, 26.84, 26.63, 22.68, 14.09. IR (KBr): 2961.55, 2929.10, 1671.814, 1456.50, 1369.53, 1232.24, 1184.84, 842.34, 740.18  $\text{cm}^{-1}$ . MS (EI)  $m/z$ : 312.14 ( $100\text{ M}^+$ ) UV-vis (DMF)  $\lambda_{\text{max}}$ : 380 nm.

### Synthesis of the Schiff base (DPTZ-SB):

To a solution of ethylene diamine (1 mmol) in methanol (10 mL), a solution of compound 2 (2 mmol) in methanol (30 mL) was added. Then, the combined mix was refluxed for 12 h at  $65\text{ }^\circ\text{C}$  under stirring. Eventually, the crude product was splashed with cold  $\text{CH}_3\text{OH}$  and dried to yield DPTZ-SB. Yield: 81 %, orange solid.  $^1\text{H}$  NMR (400 MHz,  $\text{CDCl}_3$ ):  $\delta$  8.04 (s, 2H), 7.52-7.40 (m, 5H), 7.19 (m, 3H), 6.82-7.04 (m, 6H), 3.74-3.82 (t, 8H), 1.68-1.74 (m, 5H), 1.19-1.35 (m, 12H), 0.78-0.81 (s, 5H).  $^{13}\text{C}$  NMR (100 MHz,  $\text{CDCl}_3$ ):  $\delta$  161.70, 147.53, 144.63, 127.62, 126.92, 122.91, 116.14, 115.69, 115.15, 114.98, 61.72, 31.59, 22.75, 14.14. IR (KBr): 2924.07, 2851.27, 1638.04, 1598.47, 1573.90, 1460.25, 1365.19, 1241.82, 1214.28, 1035.39, 813.86, 743.75, 532.06, 505.69.  $\text{cm}^{-1}$ . ESI-MS was not obtained because DPTZ-SB was easily decomposed. UV-vis (DMF)  $\lambda_{\text{max}}$ : 367 nm.

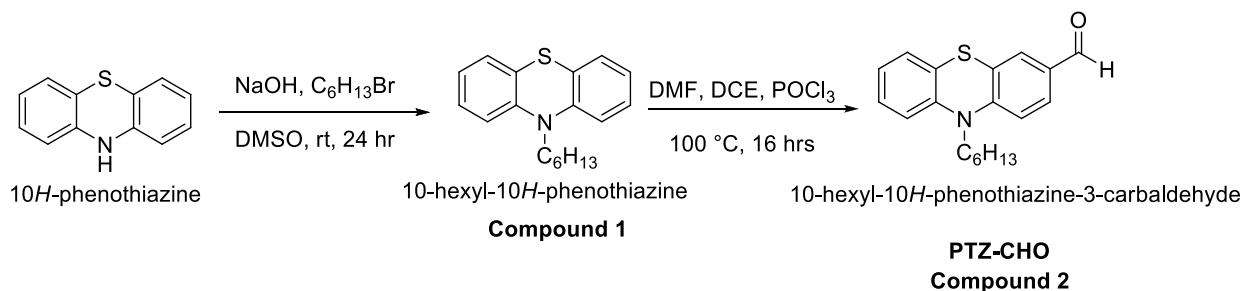

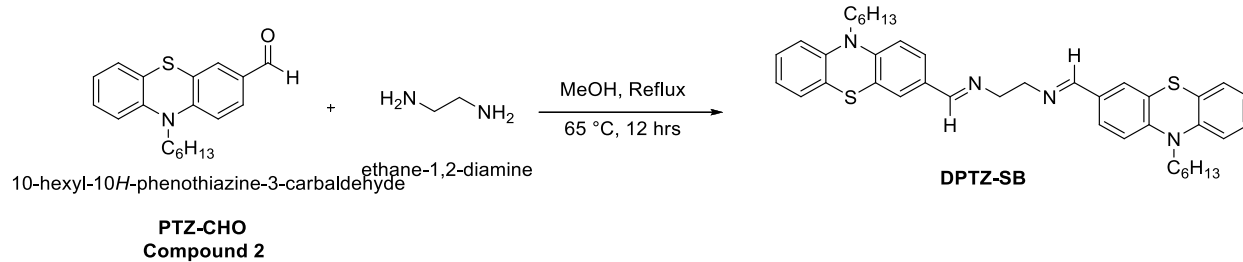

**Scheme S2: Synthesis of the Schiff base DPTZ-SB**

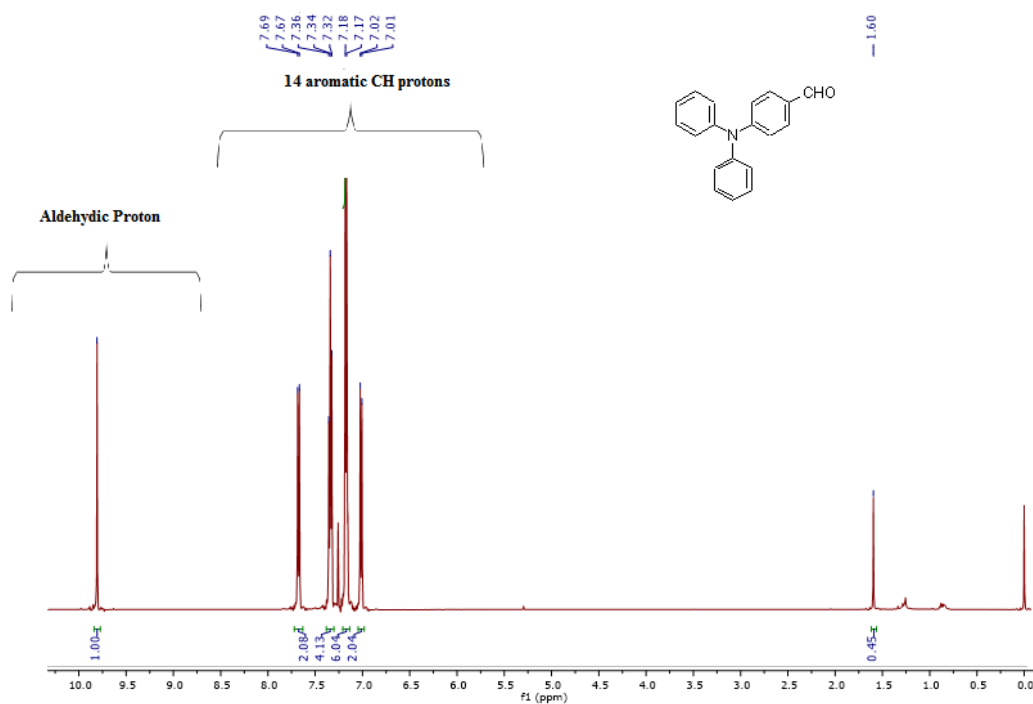

**Figure S1: <sup>1</sup>H NMR spectra of TPA-CHO**

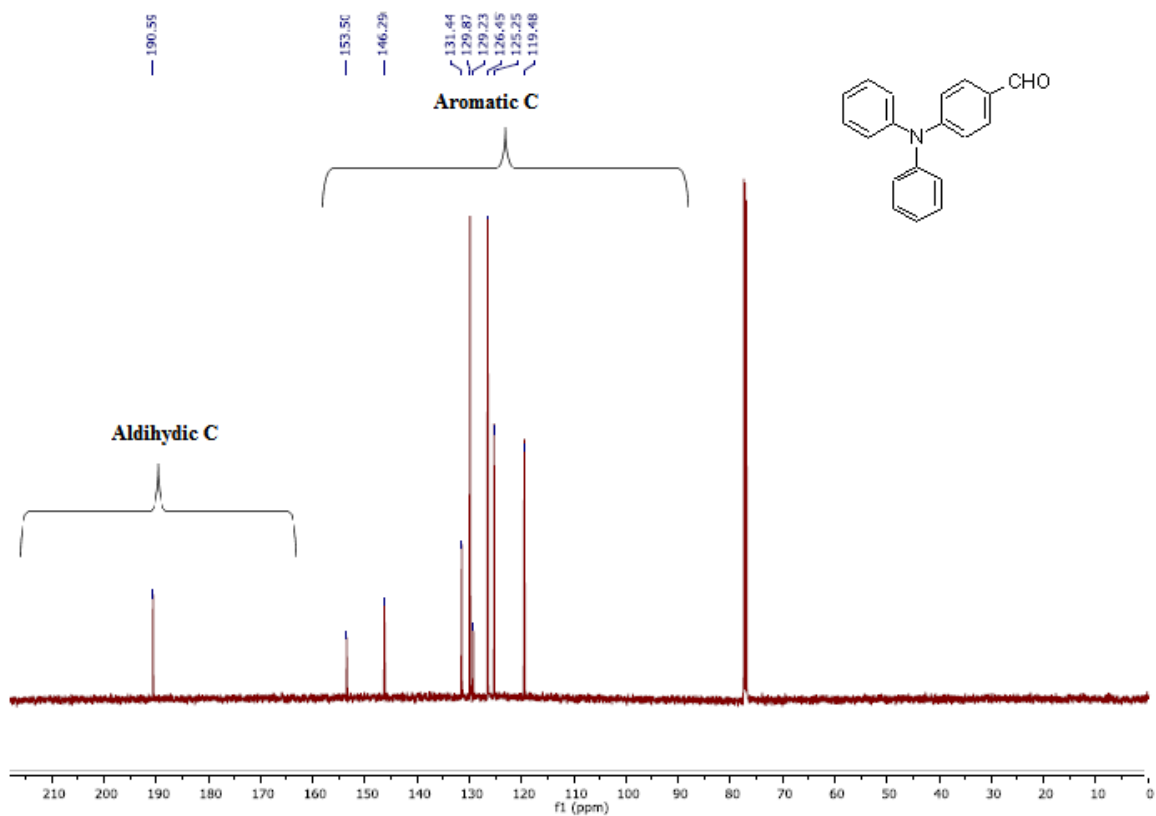

**Figure S2:**  $^{13}\text{C}$  NMR spectra of TPA-CHO

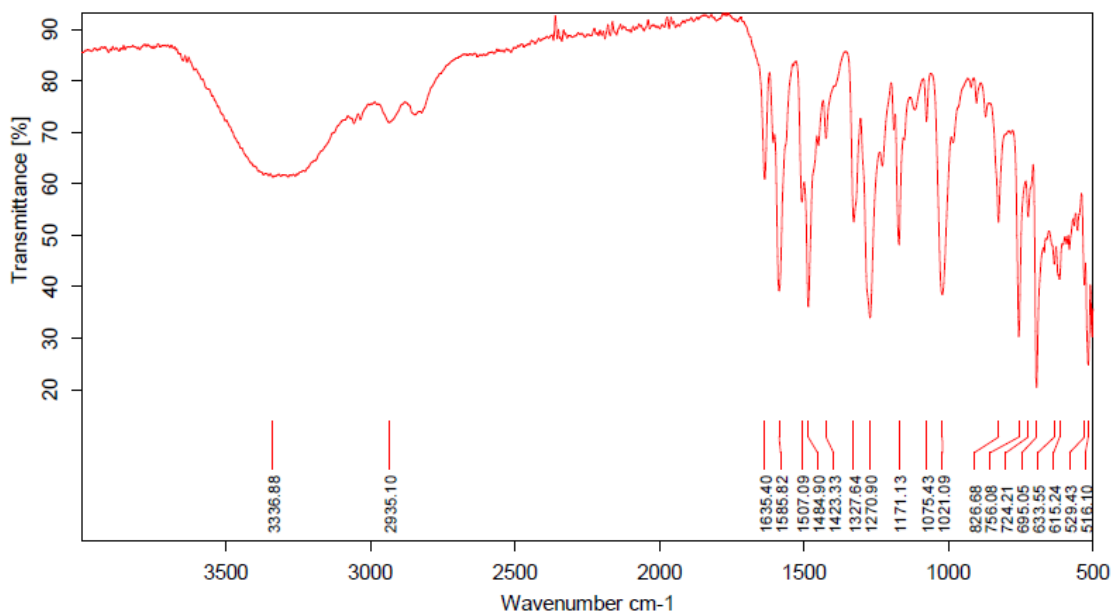

**Figure S3:** FT-IR spectra of DTPA-SB

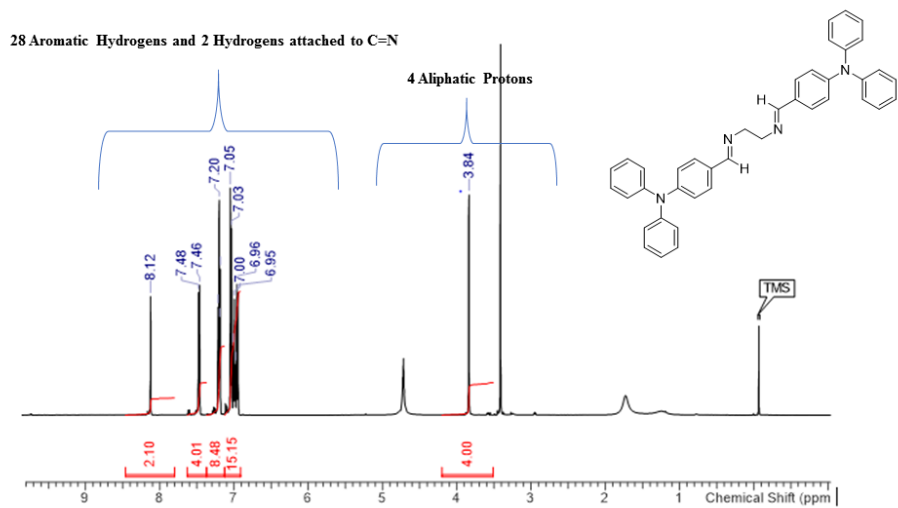

Figure S4:  $^1\text{H}$  NMR spectra of DTPA-SB

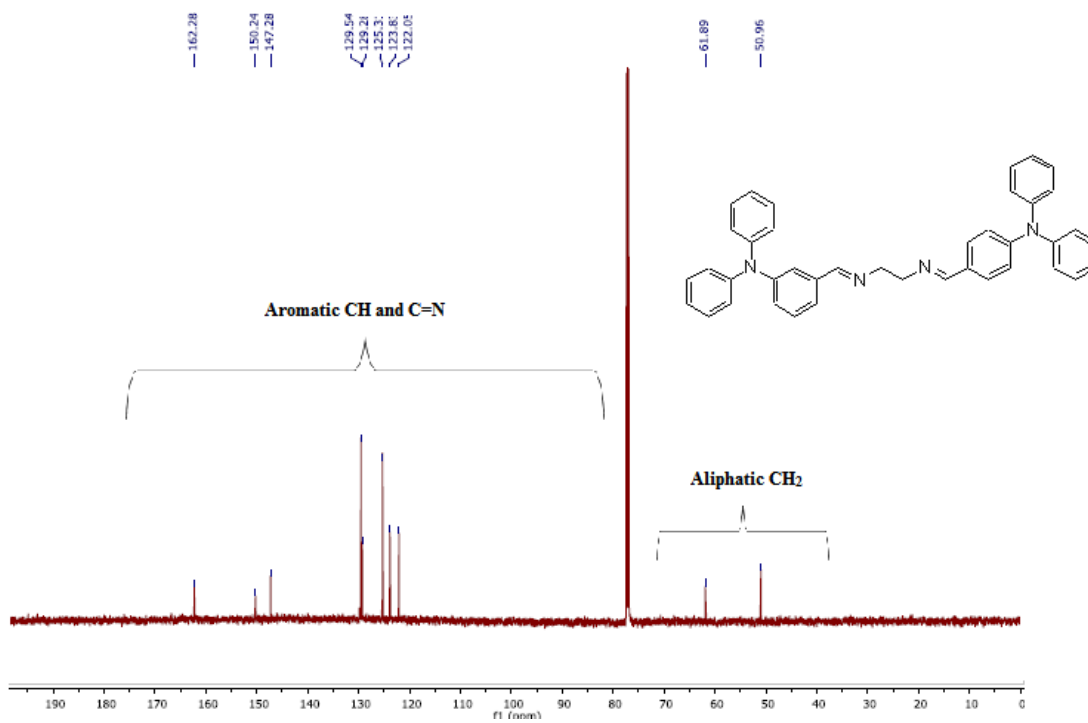

Figure S5:  $^{13}\text{C}$  NMR spectra of DTPA-SB

Monoisotopic Mass, Odd and Even Electron Ions

1 formula(e) evaluated with 1 results within limits (up to 50 best isotopic matches for each mass)

Elements Used:

C: 0-19 H: 0-16 N: 0-1 O: 0-1

RD-TPA

16082018-03-RD-TPA 23 (0.579) AM (Cen,5, 80.00, Ar,5000.0,0.00,1.00); Sb (1,40.00); Sm (Mn, 1x0.00); Cm (10:34)

TOF MS ES+  
6.12e+005

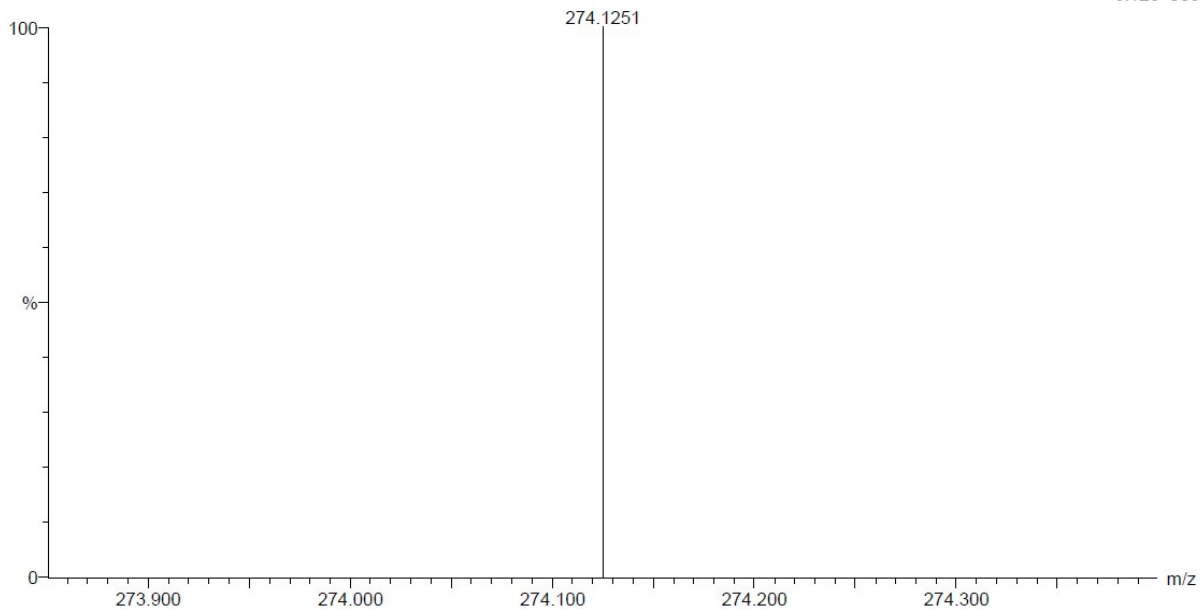

|          |            |     |      |      |       |             |
|----------|------------|-----|------|------|-------|-------------|
| Minimum: |            |     |      | -1.5 |       |             |
| Maximum: |            | 5.0 | 10.0 | 50.0 |       |             |
| Mass     | Calc. Mass | mDa | PPM  | DBE  | i-FIT | Formula     |
| 274.1251 | 274.1232   | 1.9 | 6.9  | 12.5 | n/a   | C19 H16 N O |

**Figure S6:** ESI-Mass spectrum of TPA-CHO



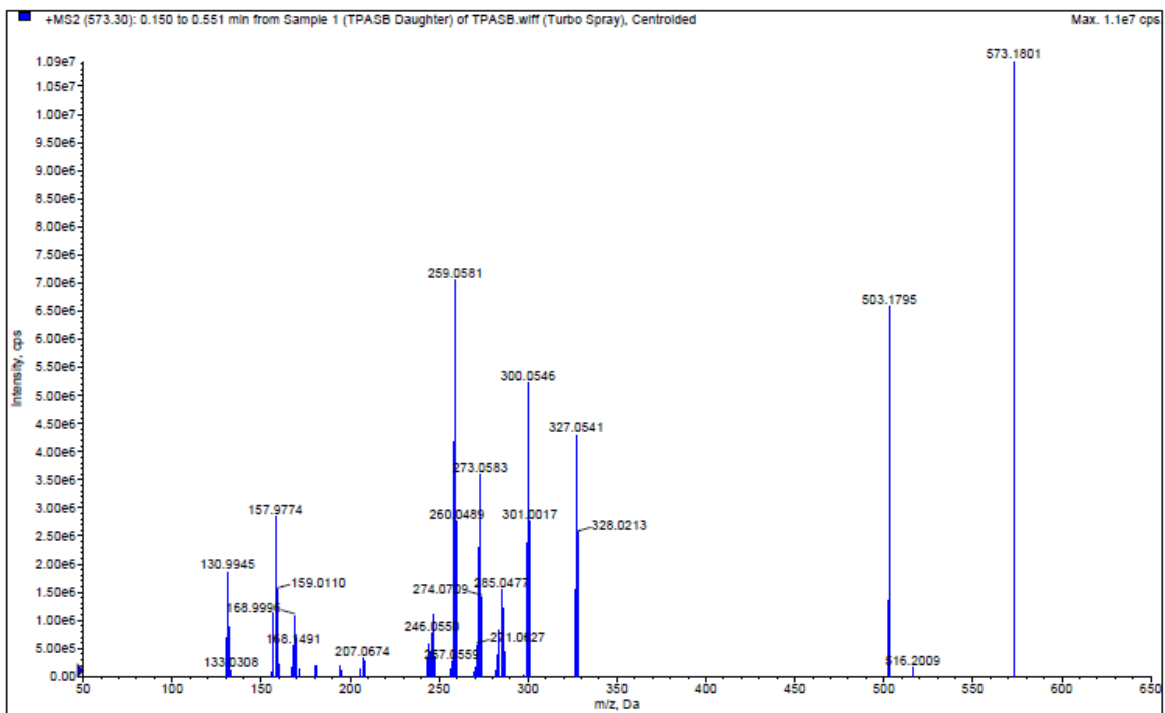

**Figure S7:** ESI-Mass spectrum of DTPA-SB

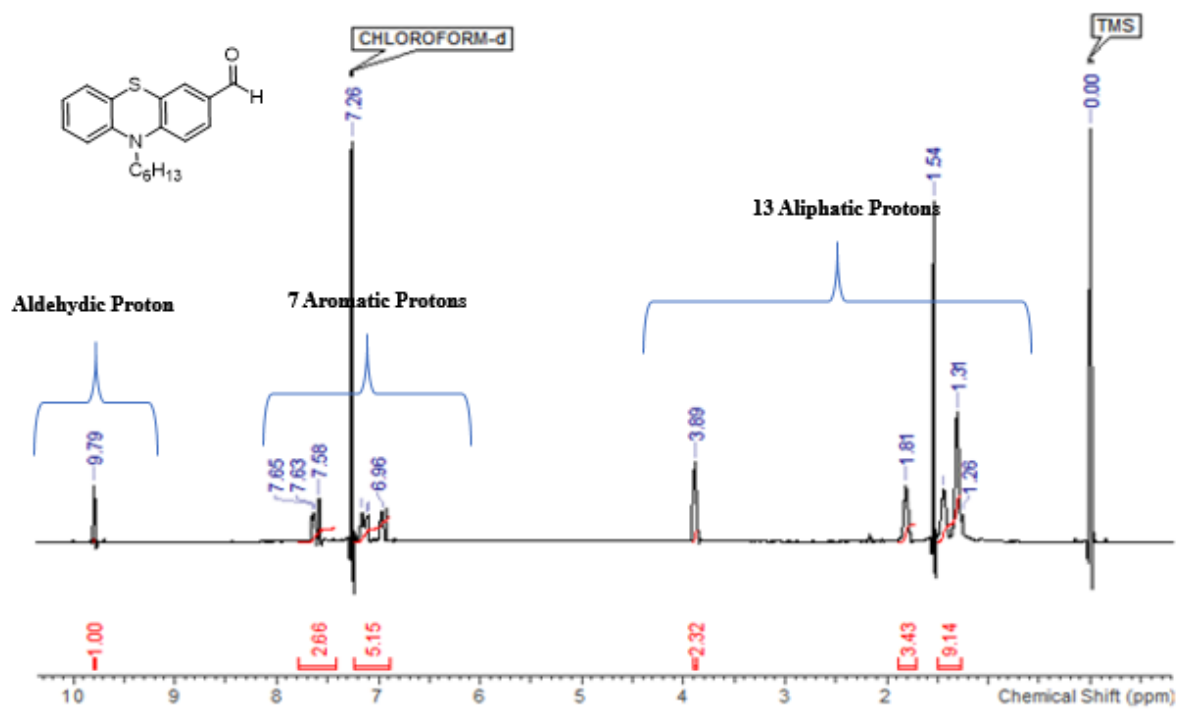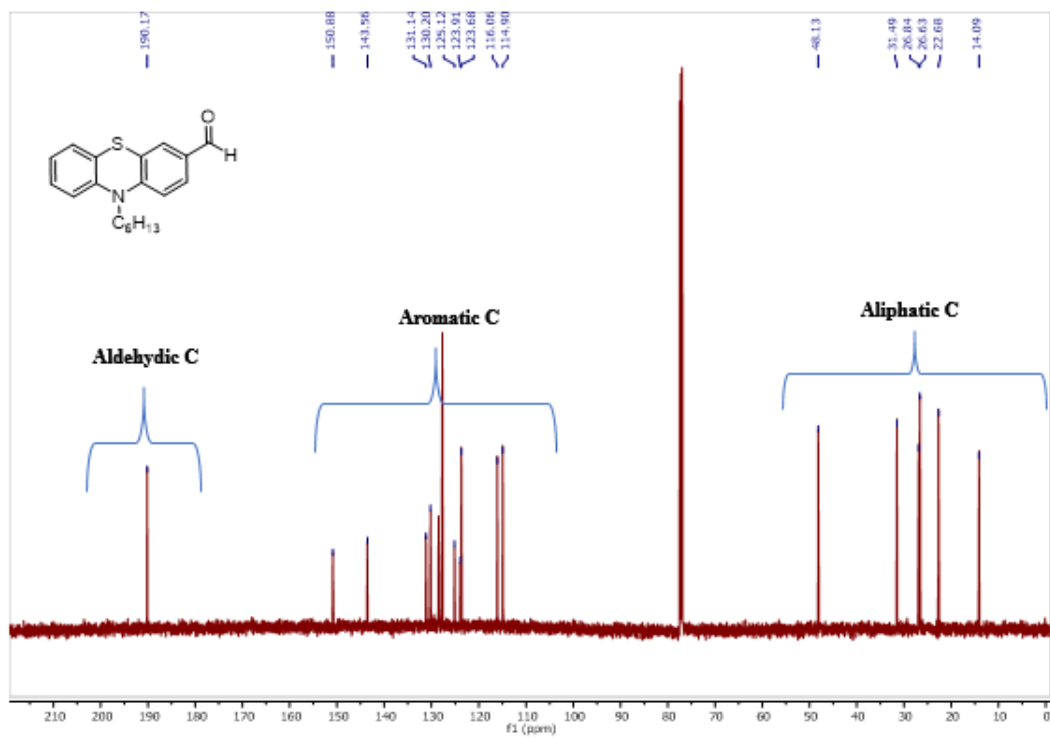

**Figure S9:  $^{13}\text{C}$  NMR Spectrum of PTZ-CHO**

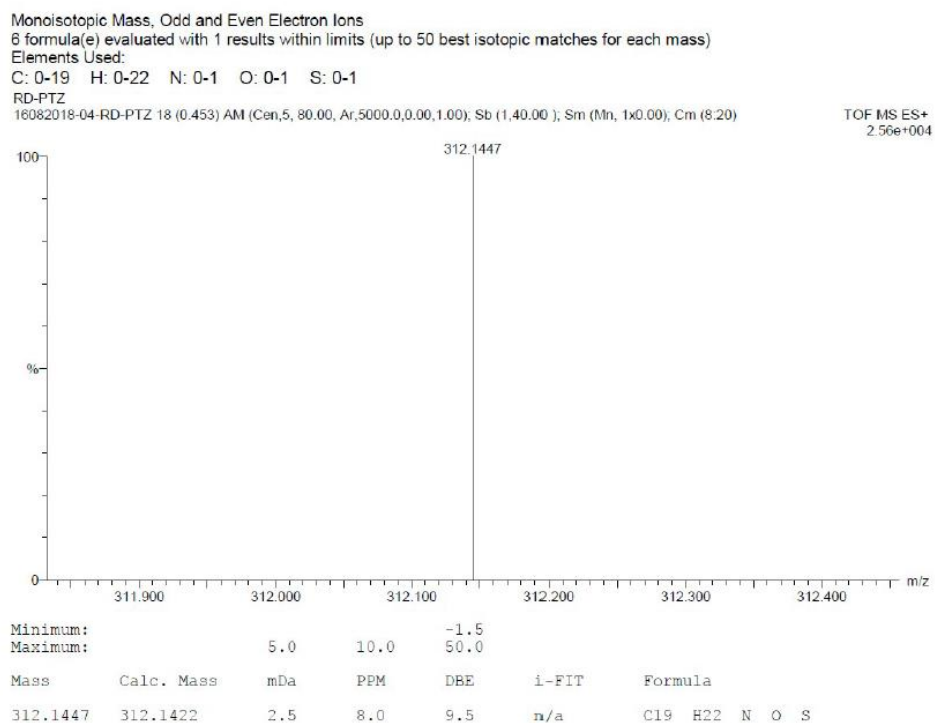

**Figure S10: ESI-Mass Spectrum of PTZ-CHO**

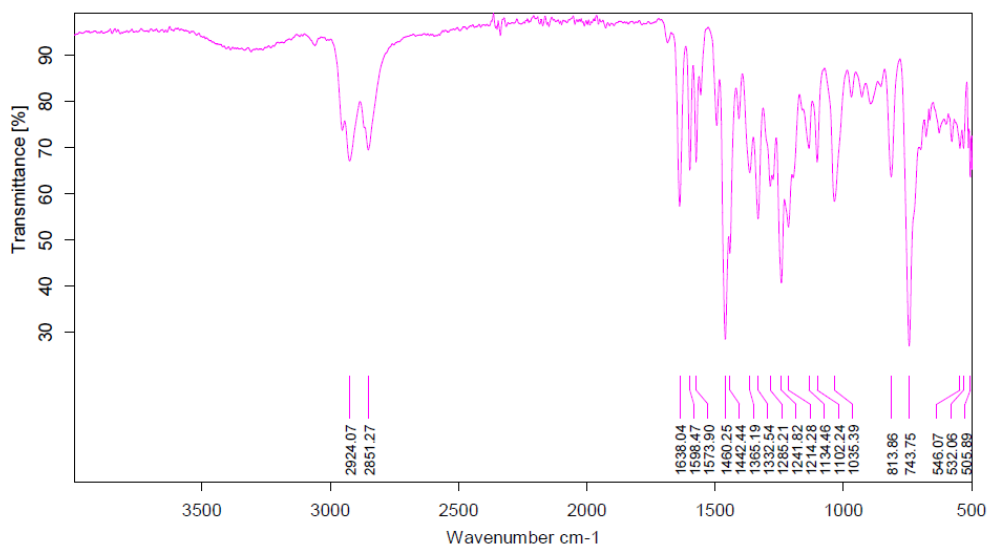

**Figure S11: FT-IR Spectrum of DPTZ-SB**

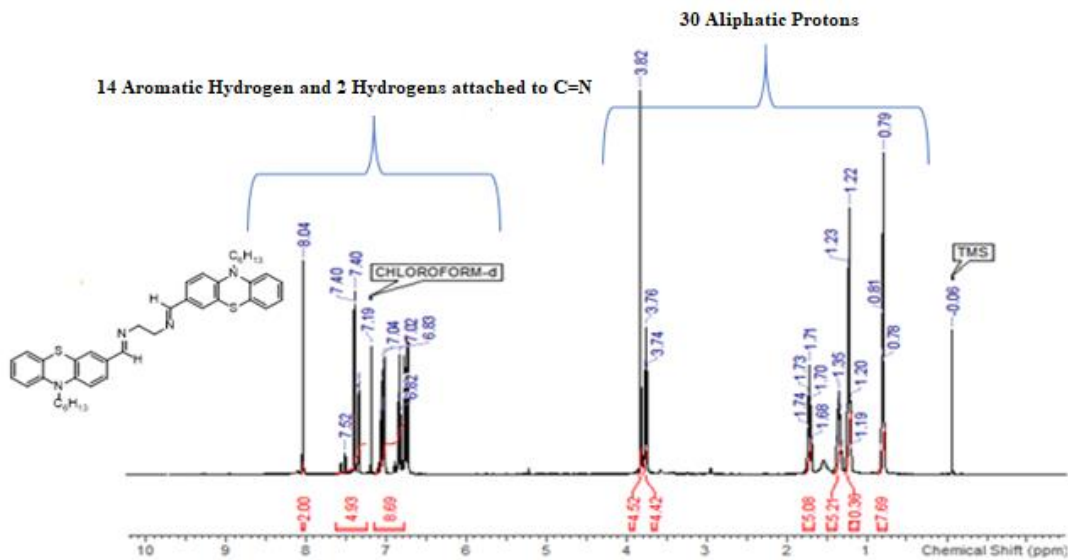

Figure S12:  $^1\text{H}$  NMR Spectrum of DPTZ-SB

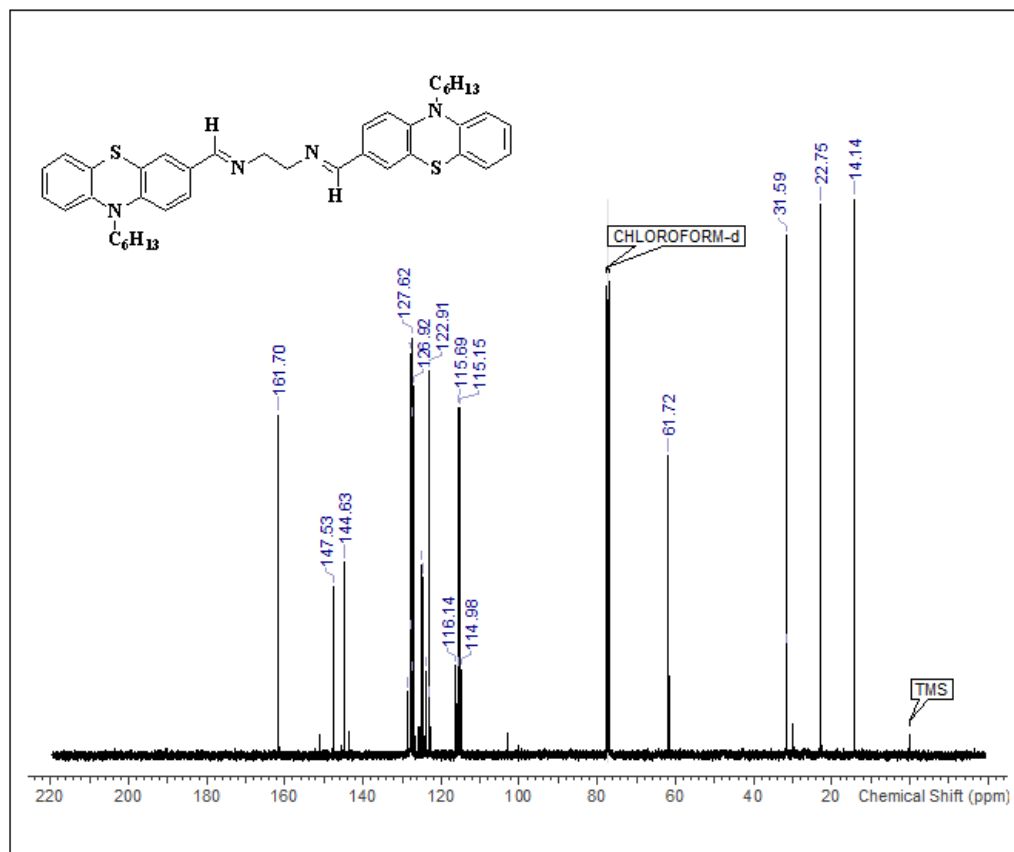

Figure S13:  $^{13}\text{C}$  NMR Spectrum of DPTZ-SB

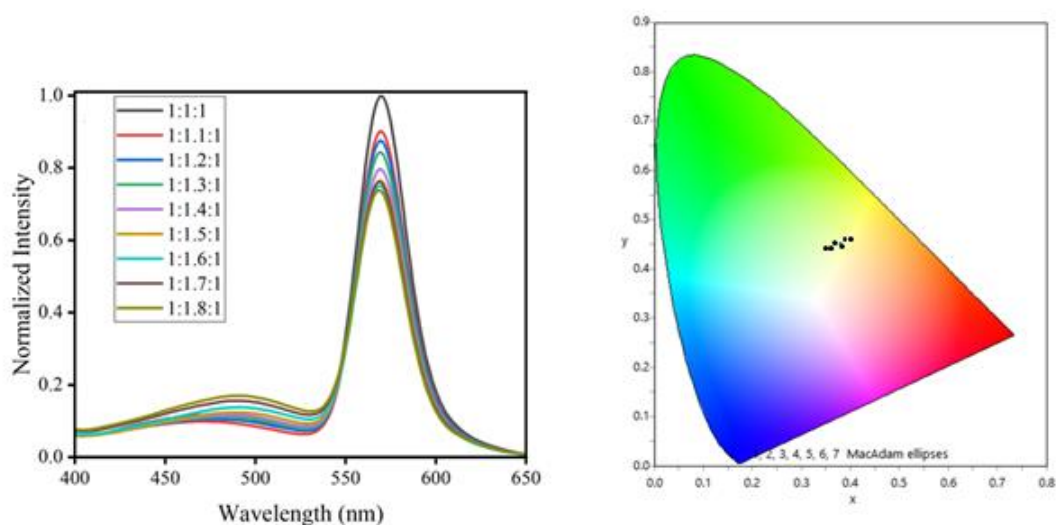

**Figure S14:** The fluorescence titration spectra on changing the volume of DPTZ-SB from 1 mL to 1.8 mL, while keeping the volume of DTPA-SB and Rh-B at 1mL each and corresponding CIE chromaticity diagram

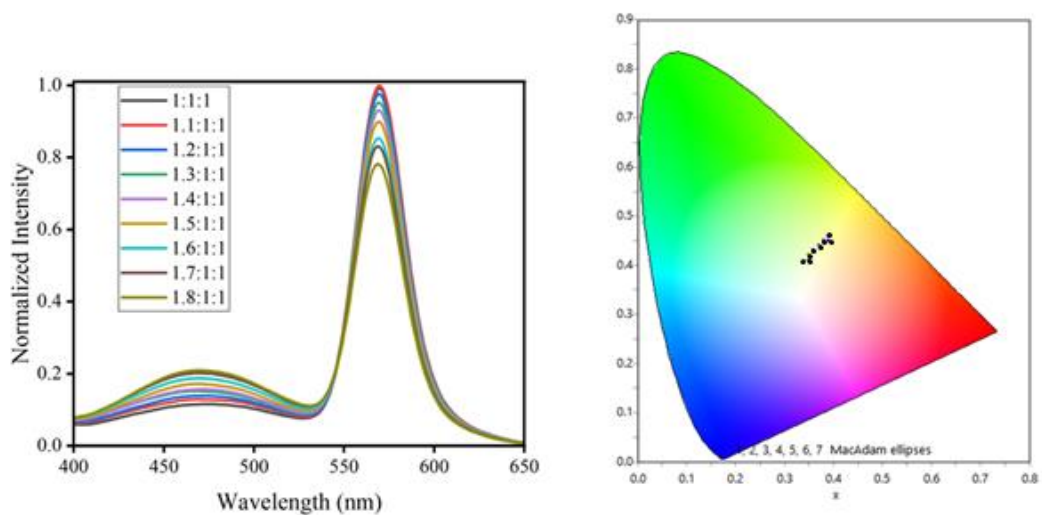

**Figure S15:** The fluorescence titration spectra on changing the volume of DTPA-SB from 1 mL to 1.8 mL, while keeping the volume of DPTZ-SB and Rh-B at 1mL each and corresponding CIE chromaticity diagram

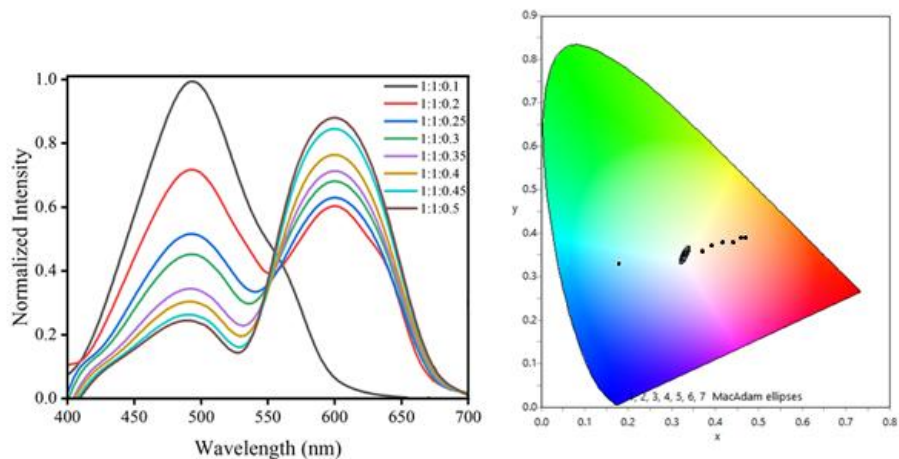

**Figure S16:** The fluorescence titration spectra on changing the volume of Rh-B from 0.1 mL to 0.5 mL, while keeping the volume of DTPA-SB and DPTZ-SB at 1 mL each and corresponding CIE chromaticity diagram

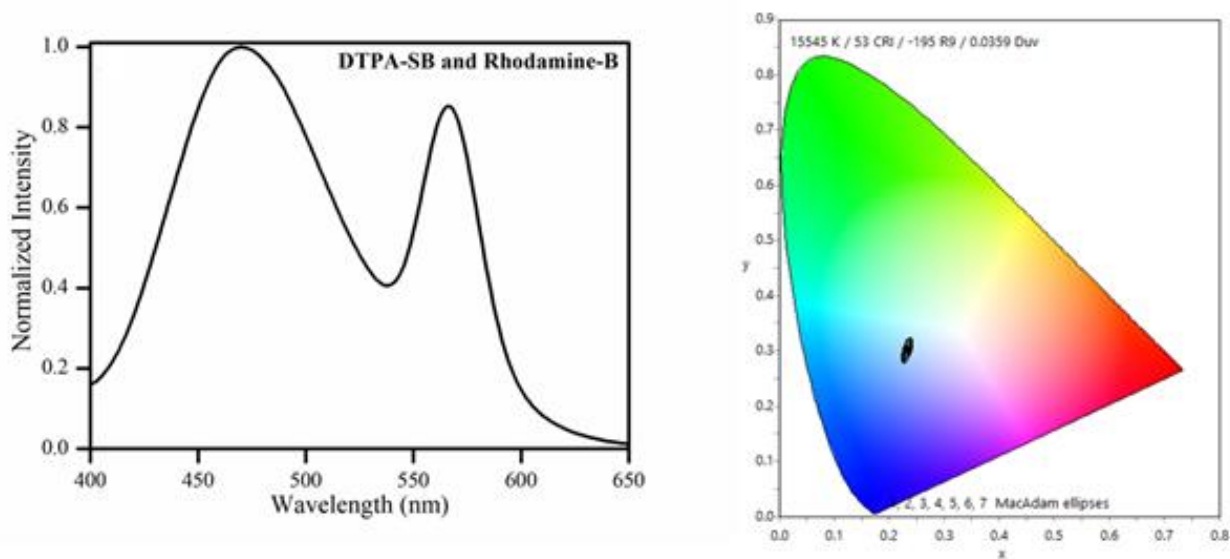

**Figure S17:** Emission spectrum of a mixture of DTPA-SB ( $10^{-4}$  M, in DMF) and Rh-B ( $10^{-5}$  M, in water) in the solution state, excited at 345 nm and CIE of corresponding light under UV excitation

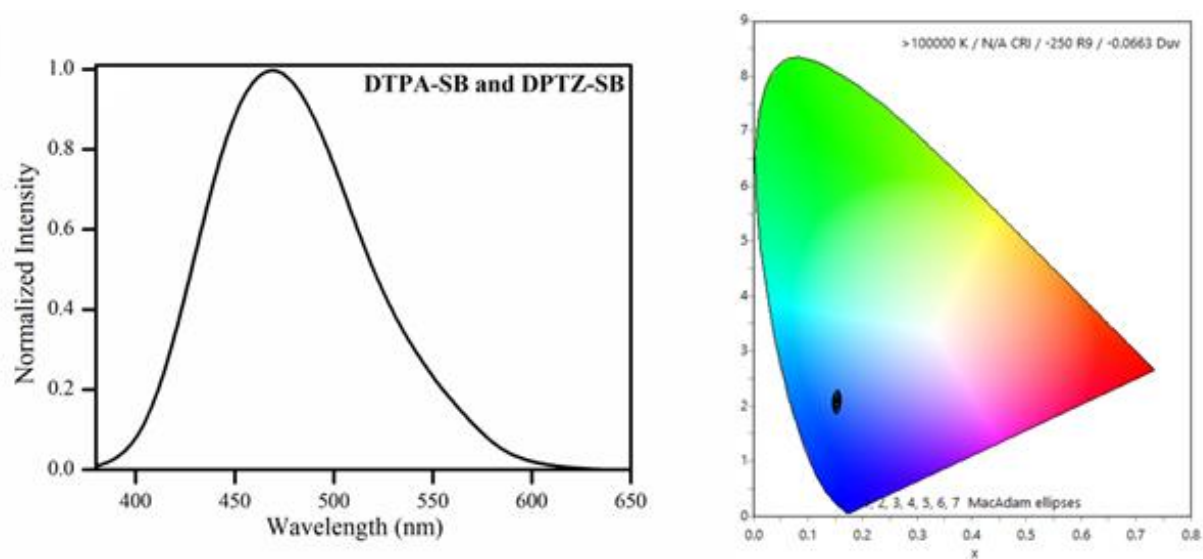

**Figure S18:** The emission spectrum of a mixture of DTPA-SB ( $10^{-4}$  M, in DMF) and DPTZ-SB ( $10^{-4}$  M, in DMF) in the solution state, excited at 345 nm and CIE of corresponding light under UV excitation

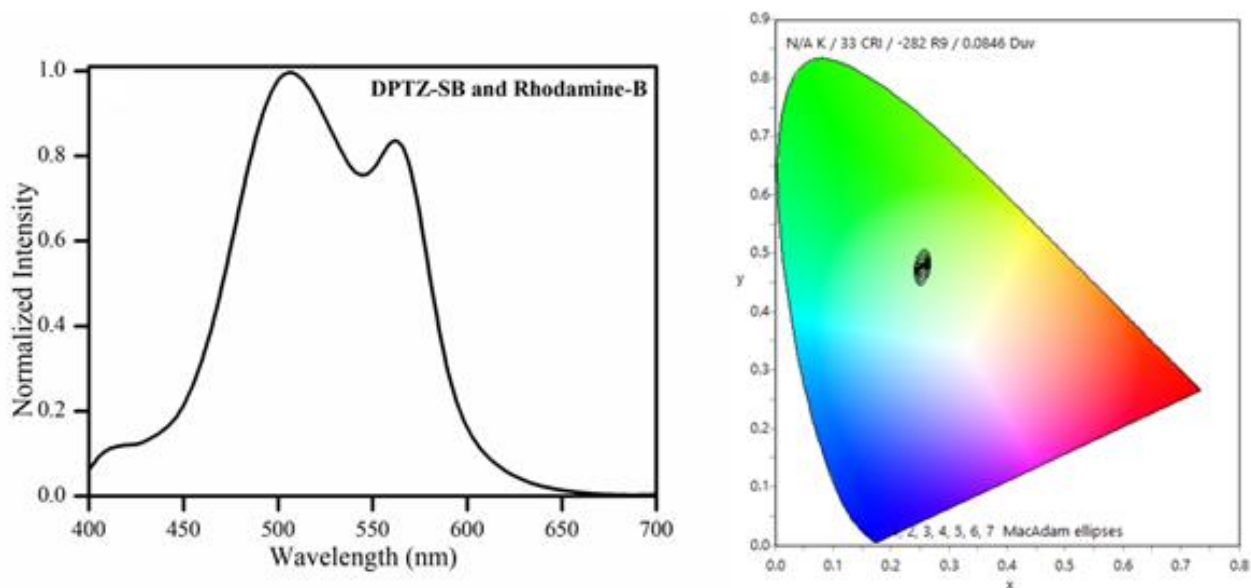

**Figure S19:** The emission spectrum of a mixture of DPTZ-SB ( $10^{-4}$  M, in DMF) and Rh-B ( $10^{-5}$  M, in water) in the solution state, excited at 367 nm and CIE of corresponding light under UV excitation

$$\Phi_f = \Phi_{ST} * \frac{S_U}{S_{ST}} * \frac{A_{ST}}{A_U}$$

where,  $\Phi_f$  is the emission quantum yield of the sample,  $\Phi_{ST}$  is the emission quantum yield of the standard, and  $A_{ST}$  and  $A_U$  represent the absorbance of the standard and the sample at the excitation wavelength, respectively.  $S_{ST}$  and  $S_U$  are the integrated emission band areas of the standard and the sample, respectively.

**Equation S1:** Quantum yield formula



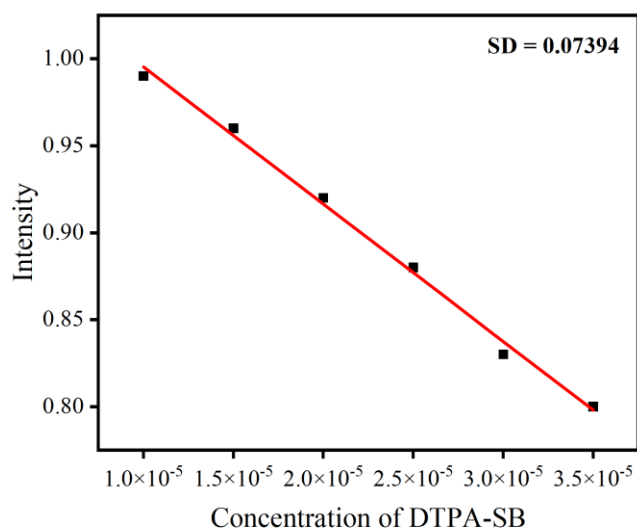

**Figure S20:** Standard deviation of DTPA-SB sample

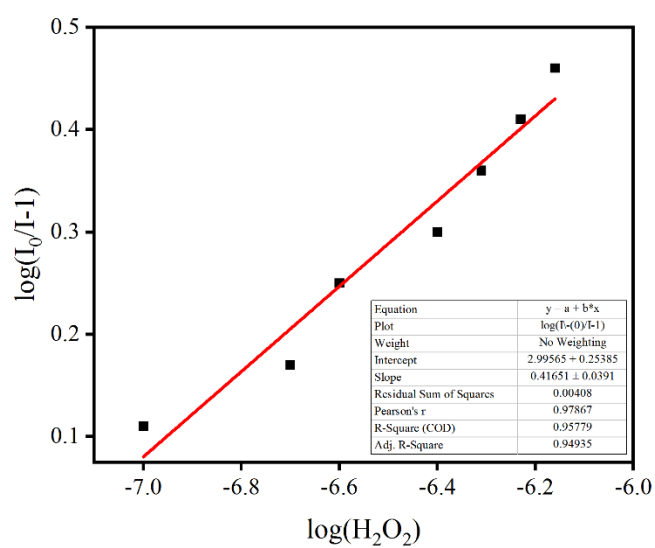

**Figure S21:** Modified Stern-Volmer plot for fluorescence quenching of DTPA-SB by 30 %  $H_2O_2$

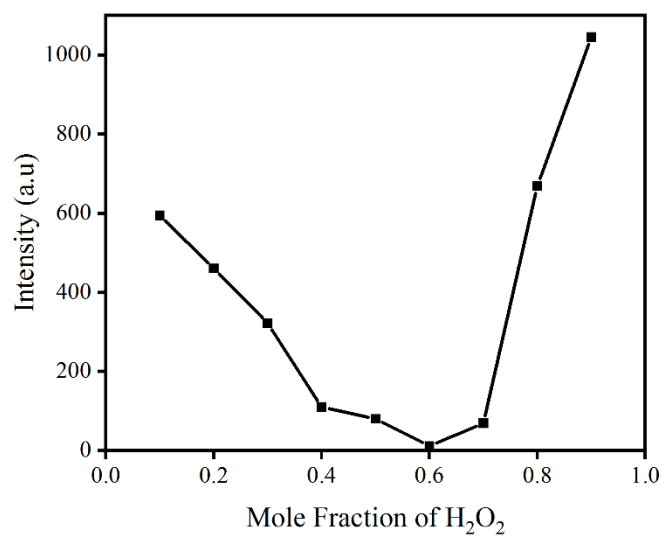

**Figure S22:** Job's plot for the realization of the stoichiometry of DTPA-SB and 30 % H<sub>2</sub>O<sub>2</sub>

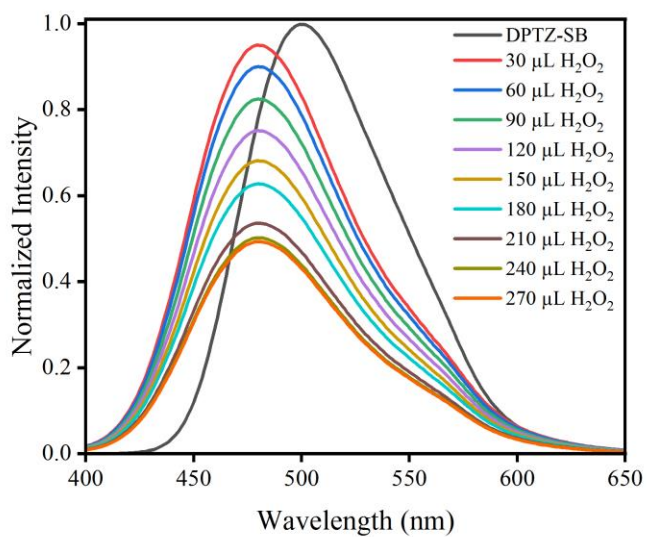

**Figure S23:** Emission spectra of DPTZ-SB with the gradual addition of different concentrations of 30 % H<sub>2</sub>O<sub>2</sub>

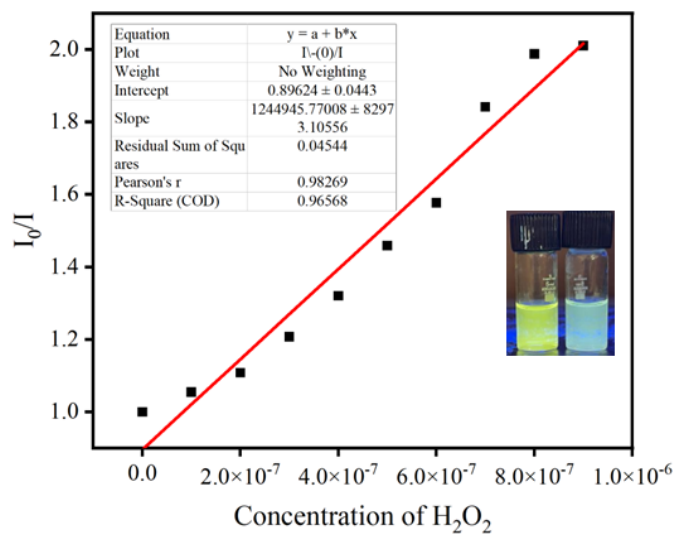

**Figure S24:** Stern-Volmer plot of DPTZ-SB under different concentrations of 30 % H<sub>2</sub>O<sub>2</sub>; The inset of the figure displays the photo of DPTZ-SB without and with 30 % H<sub>2</sub>O<sub>2</sub> under UV light

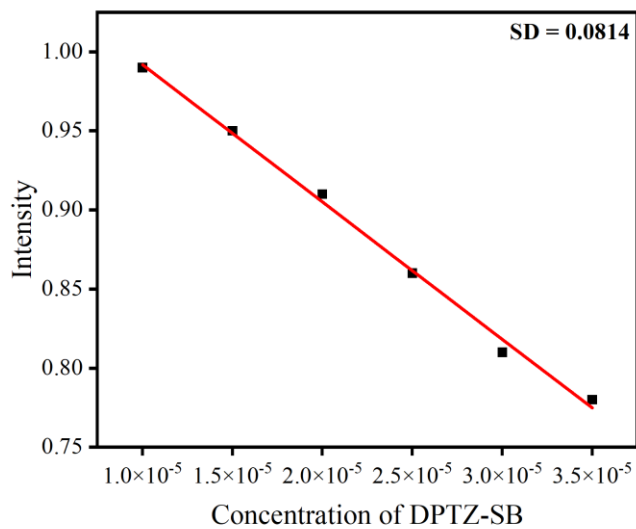

**Figure S25:** Standard deviation of DPTZ-SB sample

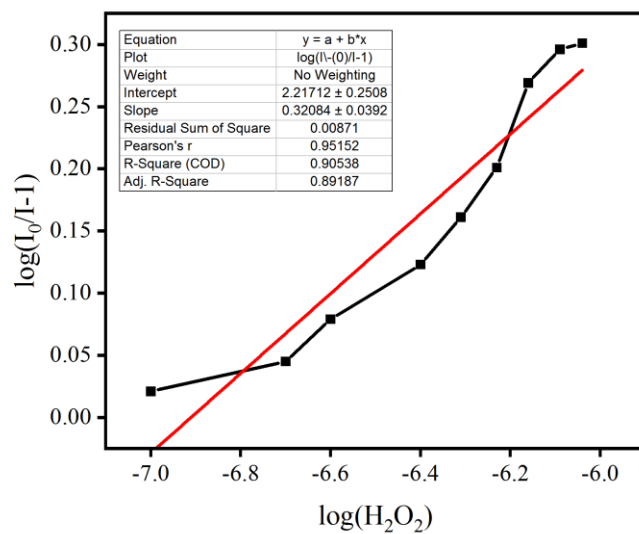

**Figure S26:** Modified Stern-Volmer plot for fluorescence quenching of DPTZ-SB by 30 % H<sub>2</sub>O<sub>2</sub>

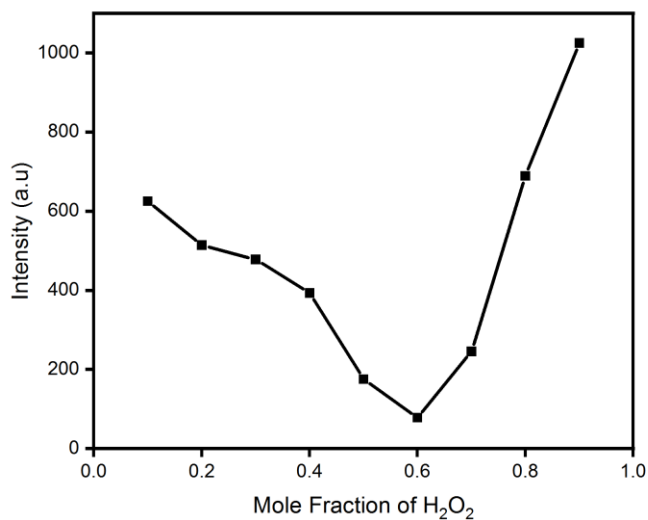

**Figure S27:** Job's plot for the realization of the stoichiometry of DPTZ-SB and 30 % H<sub>2</sub>O<sub>2</sub>

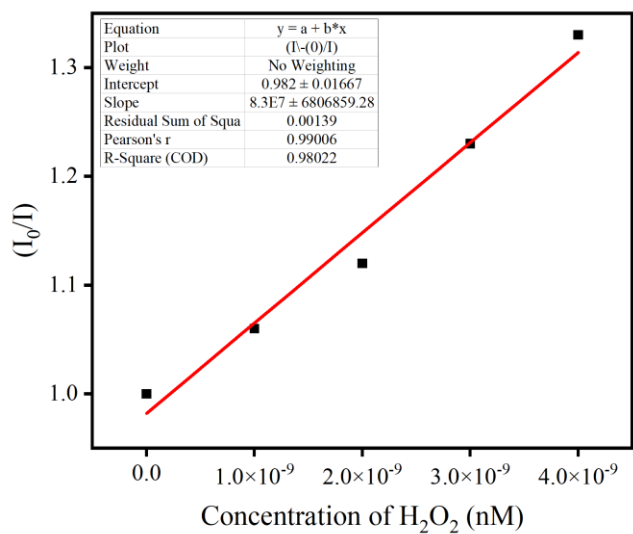

**Figure S28:** Stern–Volmer plot of DTPA-SB based paper sensor in the presence of 30 % H<sub>2</sub>O<sub>2</sub> (nM)

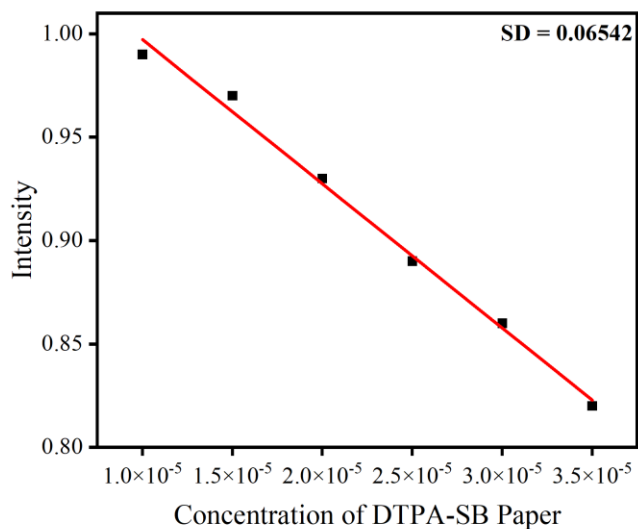

**Figure S29:** Standard deviation of DTPA-SB based paper sensor

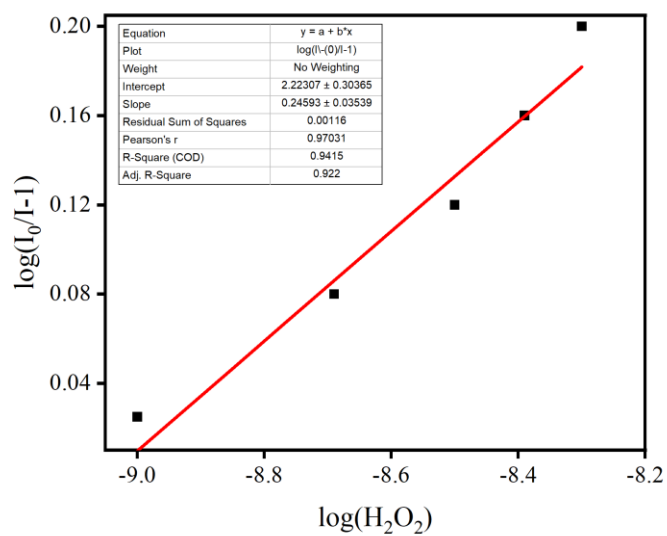

**Figure S30:** Modified Stern-Volmer plot of DTPA-SB based paper sensor in presence of 30 % H<sub>2</sub>O<sub>2</sub> (nM)

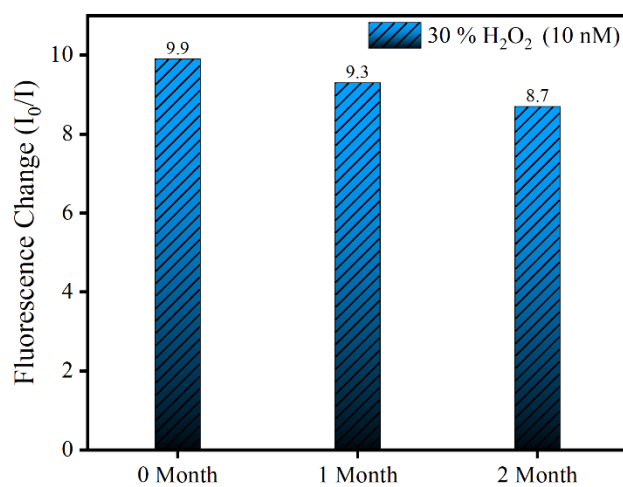

**Figure S31:** Stability of Paper Sensor after 2 months a) DTPA-SB and b) DPTZ-SB

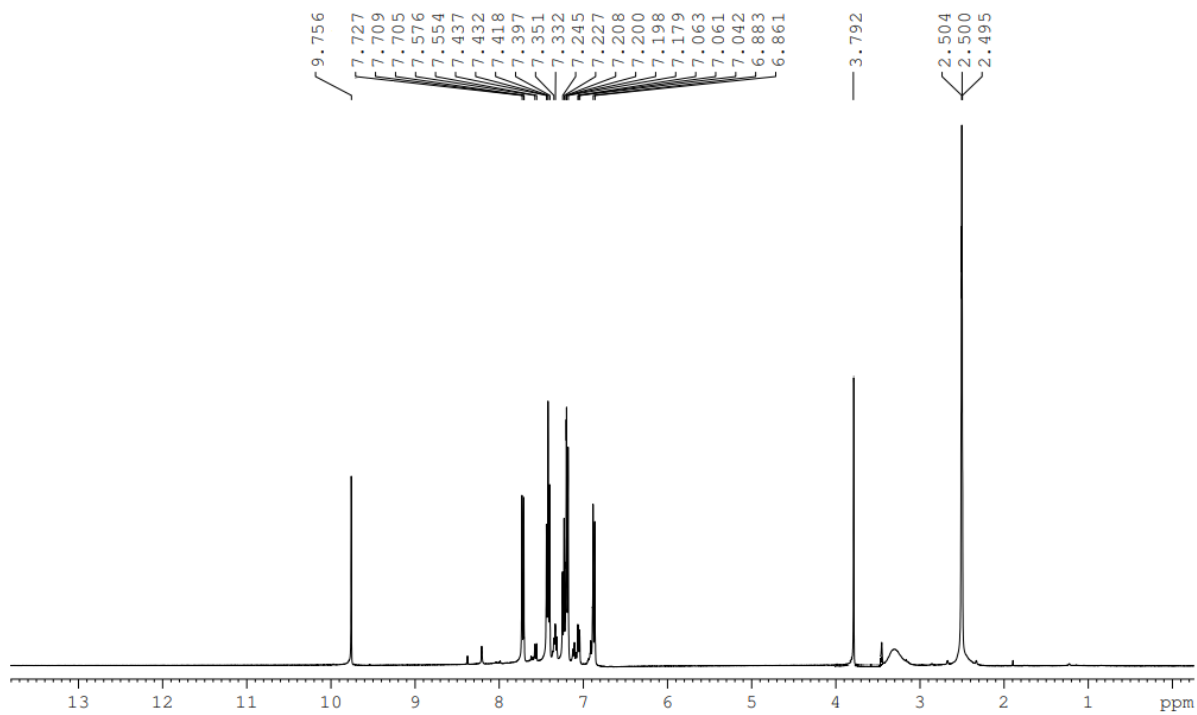

**Figure S32:**  $^1\text{H}$  NMR spectra of DTPA-SB in presence of two equivalents of  $\text{H}_2\text{O}_2$
